# Supplementary material
Source: Springer Nature journal article supplement (https://www.springermedizin.de/resource/supplementary/13075_2013_4154_MOESM2_ESM.pdf/9696212)

**A**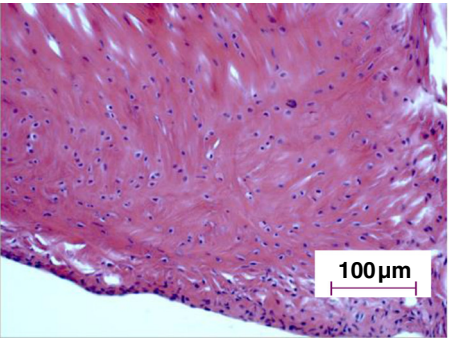**B**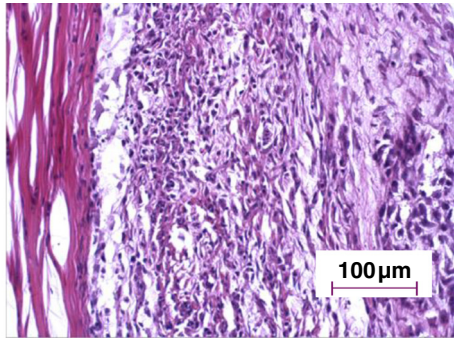

Supplement: MOESM2 [file 9696212]
